# Supplementary material for: Beneficial effects of murtilla extract and madecassic acid on insulin sensitivity and endothelial function in a model of diet-induced obesity
Source: PubMed Central journal article supplement (PMC6345770; doi:10.1038/s41598-018-36555-1), 2019-01-24
Supplement: 41598_2018_36555_MOESM1_ESM.pdf [file 41598_2018_36555_MOESM1_ESM.pdf]

**SUPPLEMENTARY INFORMATION**

**Beneficial effects of murtilla extract and madecassic acid on insulin sensitivity and endothelial function in a model of diet-induced obesity**

**Jorge Arancibia-Radich<sup>1</sup>, Raquel González-Blázquez<sup>2</sup>, Martín Alcalá<sup>3</sup>, Miriam Martín-Ramos<sup>4,5</sup>, Marta Viana<sup>3</sup>, Silvia Arribas<sup>6</sup>, Carla Delporte<sup>1</sup>, María S. Fernández-Alfonso<sup>4,5</sup>, Beatriz Somoza<sup>2\*</sup> and Marta Gil-Ortega<sup>2\*</sup>**

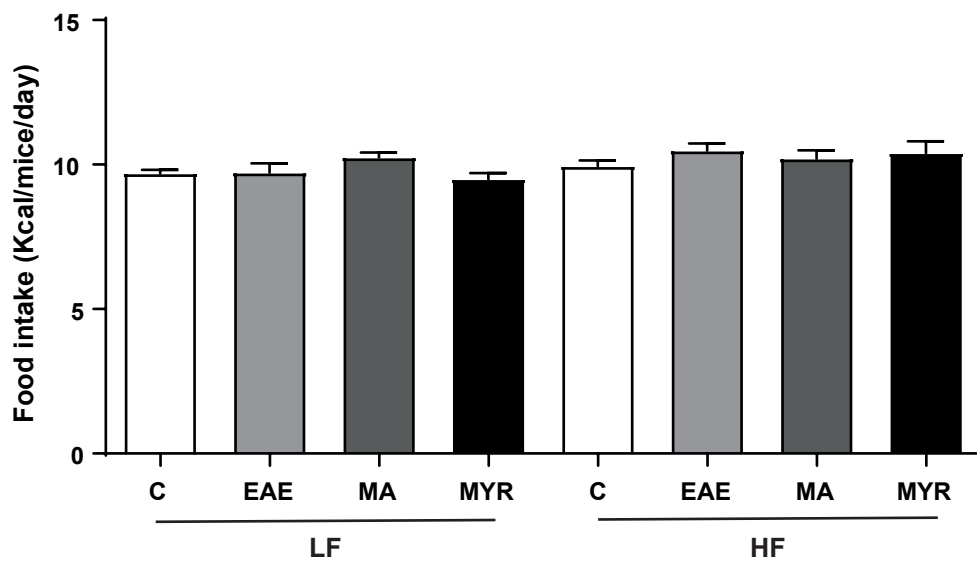

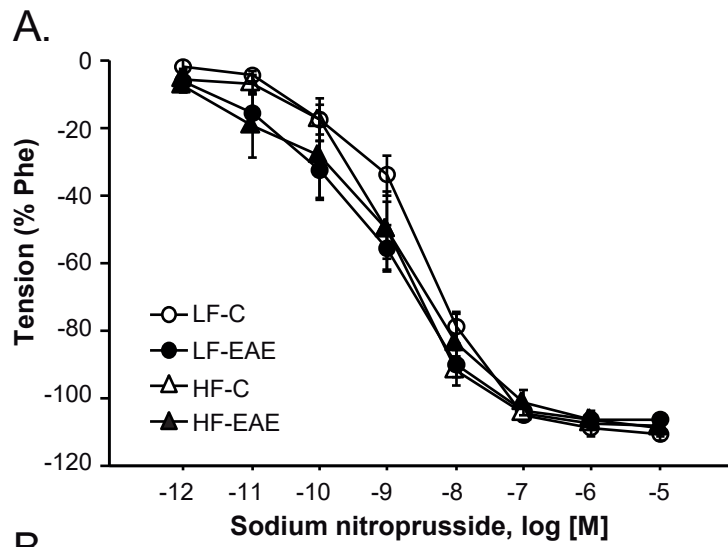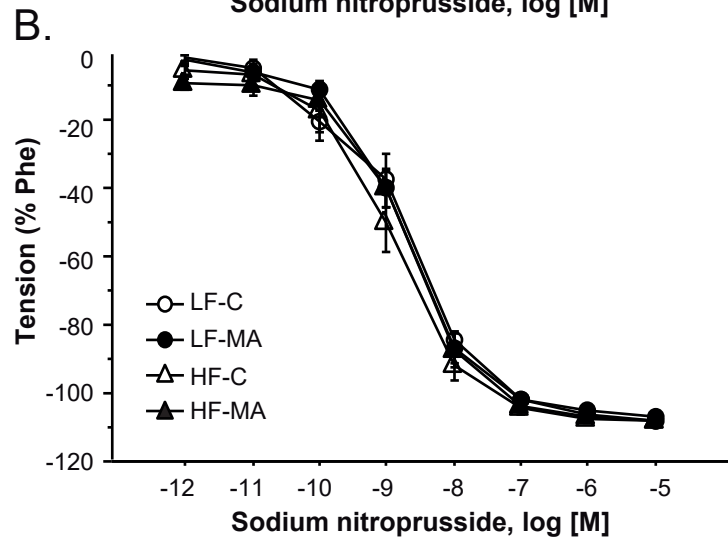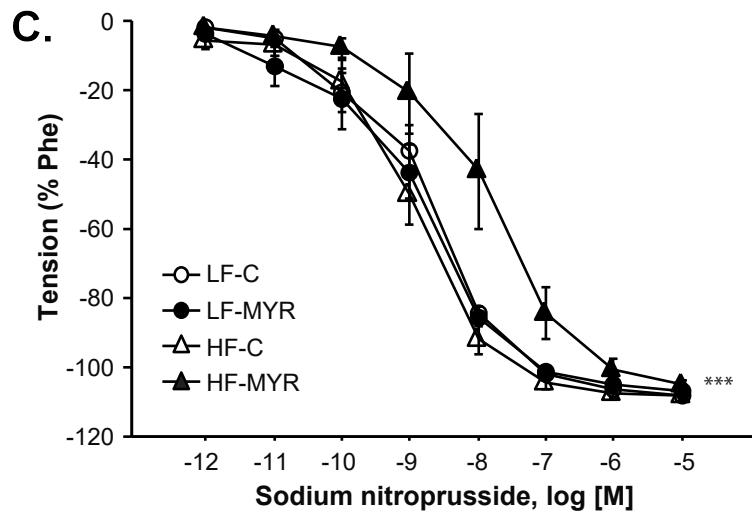

**A. P-Akt/Akt**

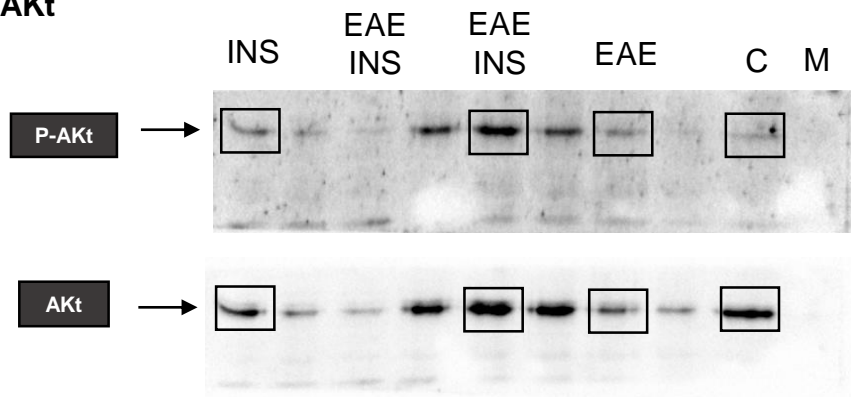

**B. P-eNOS/eNOS**

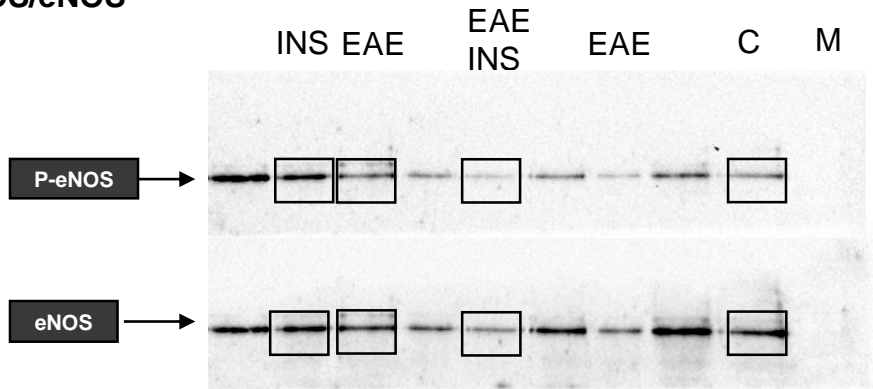

**C. P-Akt/Akt**

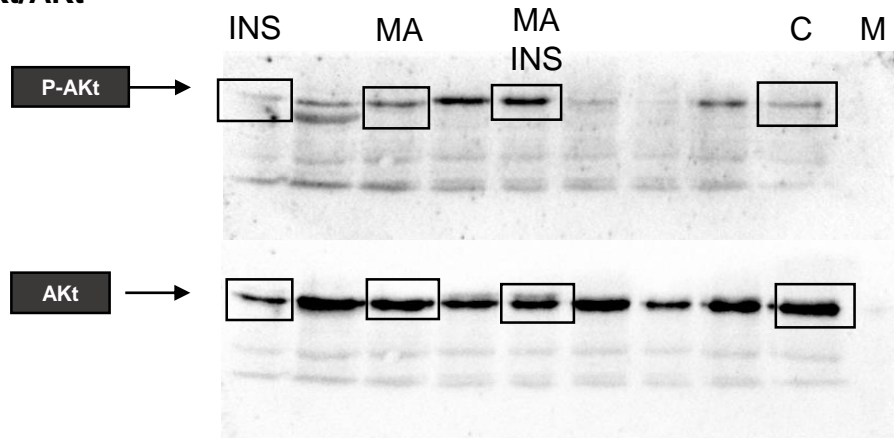

**D. P-eNOS/eNOS**

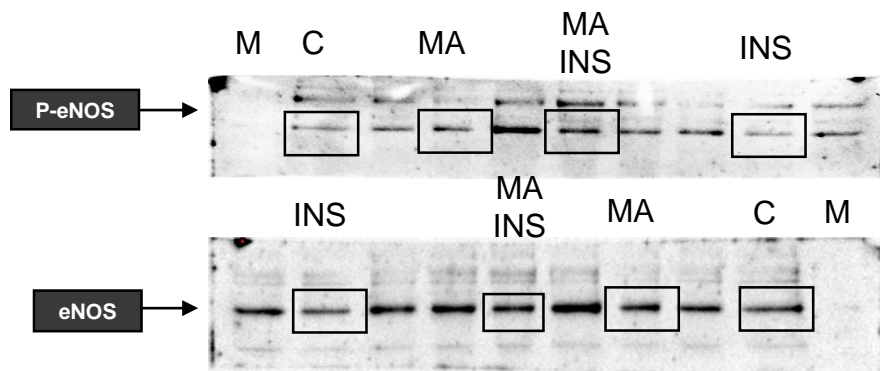

Selected bands for figure 6

## **SUPPLEMENTARY FIGURE LEGENDS**

### **Supplementary Figure 1**

Diagram bars show food intake in all experimental groups. Data are expressed in Kcal/mice/day and as mean  $\pm$  SEM of 5 determinations per group.

### **Supplementary Figure 2**

Cumulative concentration-response curves to sodium nitroprusside ( $10^{-12}$ - $10^{-5}$ M) in aortic segments from LF and HF mice treated or not with EAE (A), MA (B), or MYR (C). Data are expressed as mean  $\pm$  SEM of 5 determinations per group. \*\*\* $p < 0.001$  compared with the corresponding control group.

### **Supplementary Figure 3**

Full-length blots selected for Figure 6, that constitute the most representative immunoblots of p-Akt/Akt and p-eNOS/eNOS expression.
